# Supplementary material
Source: MDPI journal article supplement (https://www.mdpi.com/2071-1050/10/10/3673)
Supplement: s1 [file s1]

## SUPPLEMENTARY MATERIALS

### Macroeconomic impacts of climate change associated with changes in crop yields

1. Supplementary Figures
- 2.

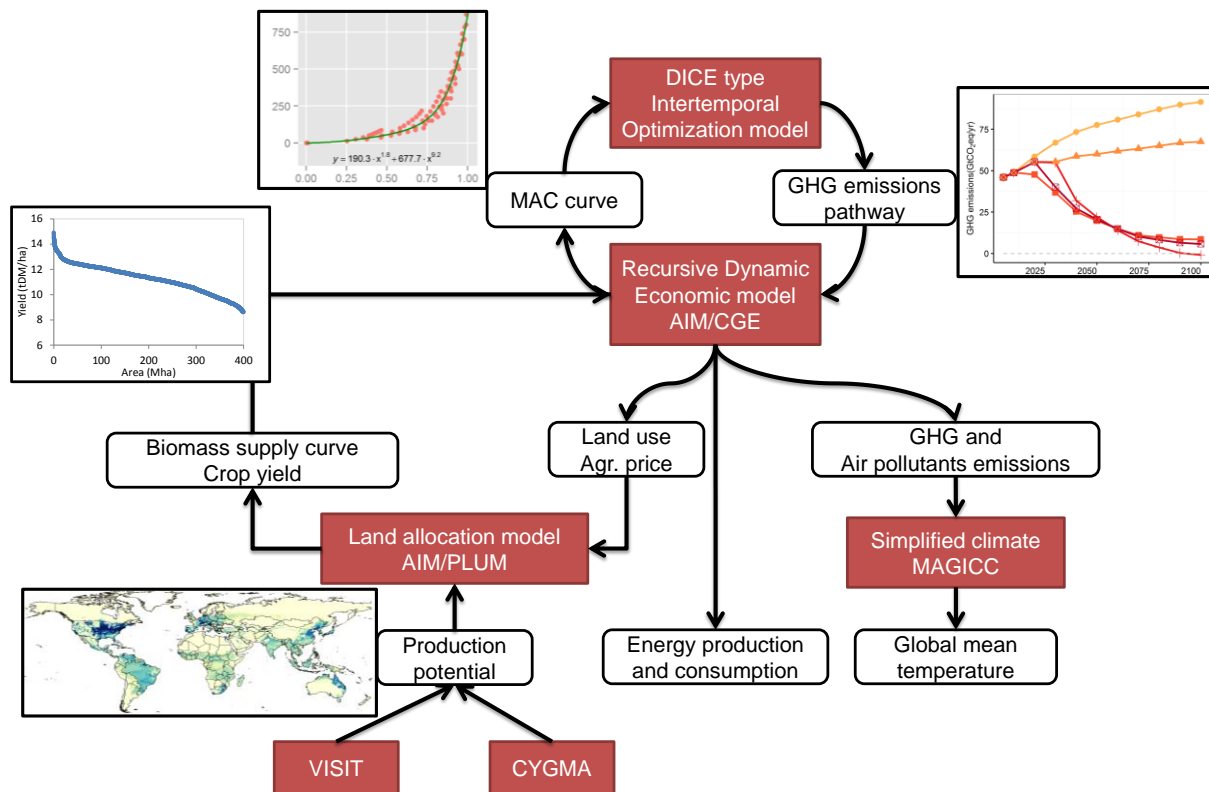

**Figure S1.** Asia-Pacific Integrated Model (AIM) modeling framework.

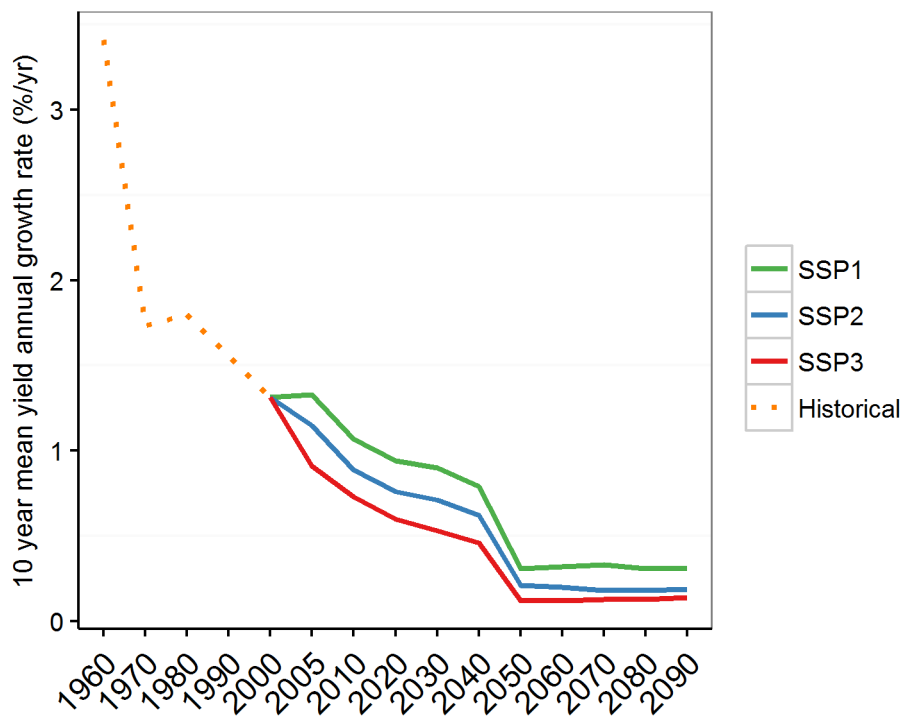

**Figure S2.** Ten-year mean annual yield growth rate for the SSP1, SSP2, and SSP3 baseline scenarios. The

x-axis represents each decadal period (i.e., 1960 means the 1960s). This figure is adapted from Fujimori et al. (2017) [1].

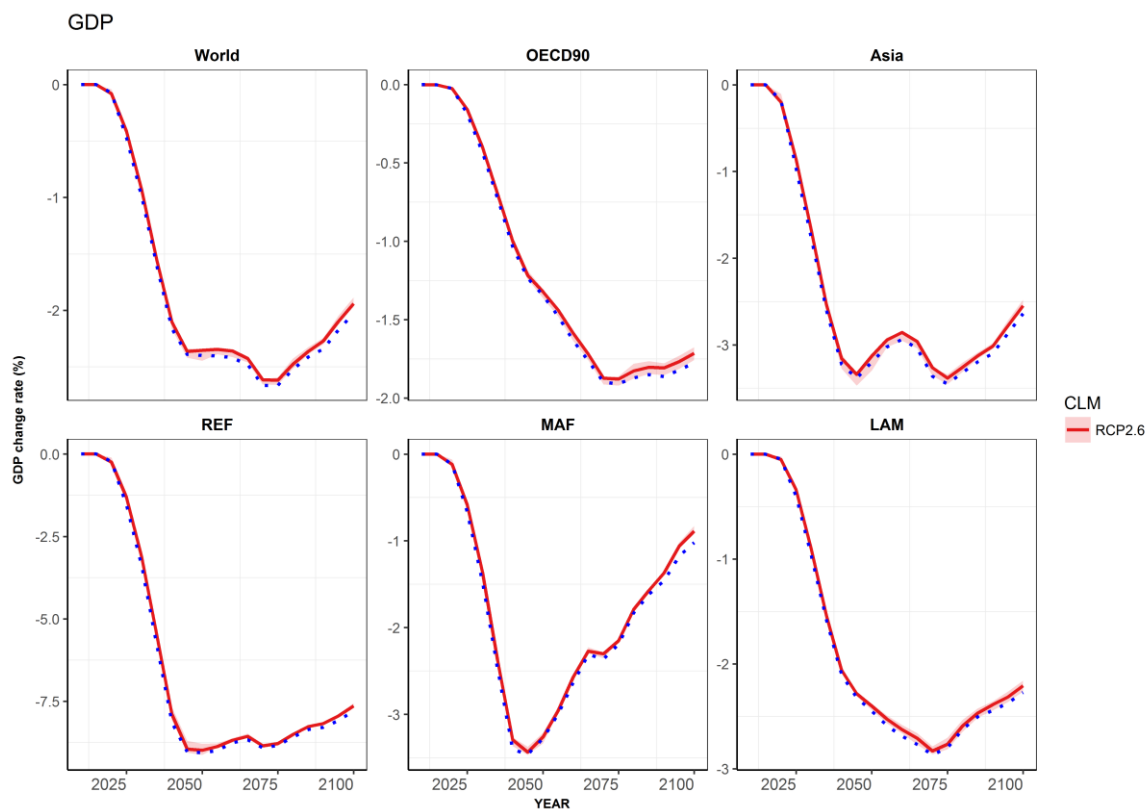

**Figure S3.** The macroeconomic impact due to mitigation policy (RCP2.6 equivalent) and agricultural yield change for RCP2.6 for five regions and the global total. All cases considered a mitigation policy, but the dotted line indicates no consideration of climate change (NoCC), while the red colored ribbon indicates the cases where the impact of climate change was considered. The red line is the median of the climate change impact cases. Regional codes are OECD90, OECD regions; Asia, Asia; REF, Reforming region; MAF, Middle East and Africa; and LAM, Latin America. (The mapping procedure from 17 regions is shown in Table S1.)

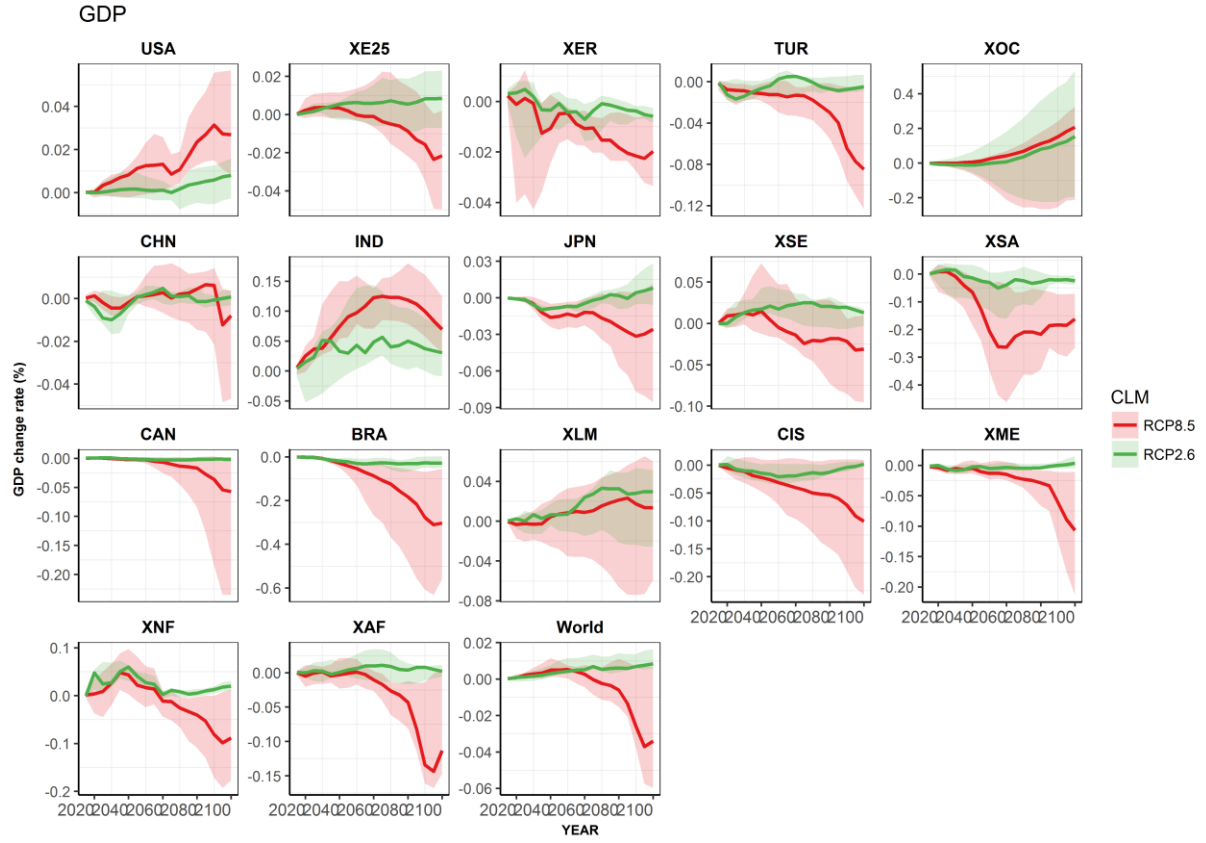

**Figure S4.** Macroeconomic impact due to changes in agricultural yield in SSP2 in five regions and as a global total. The colors represent climate change level (RCPs). The shaded area is the general circulation model (GCM) range of uncertainty (five GCMs for RCP8.5, and RCP2.6). The lines are the median of five GCMs for each RCP2.6 and RCP8.5. The scenarios in which CO<sub>2</sub> fertilization and land-use change are both included are shown. Regional codes are shown in Table S1.

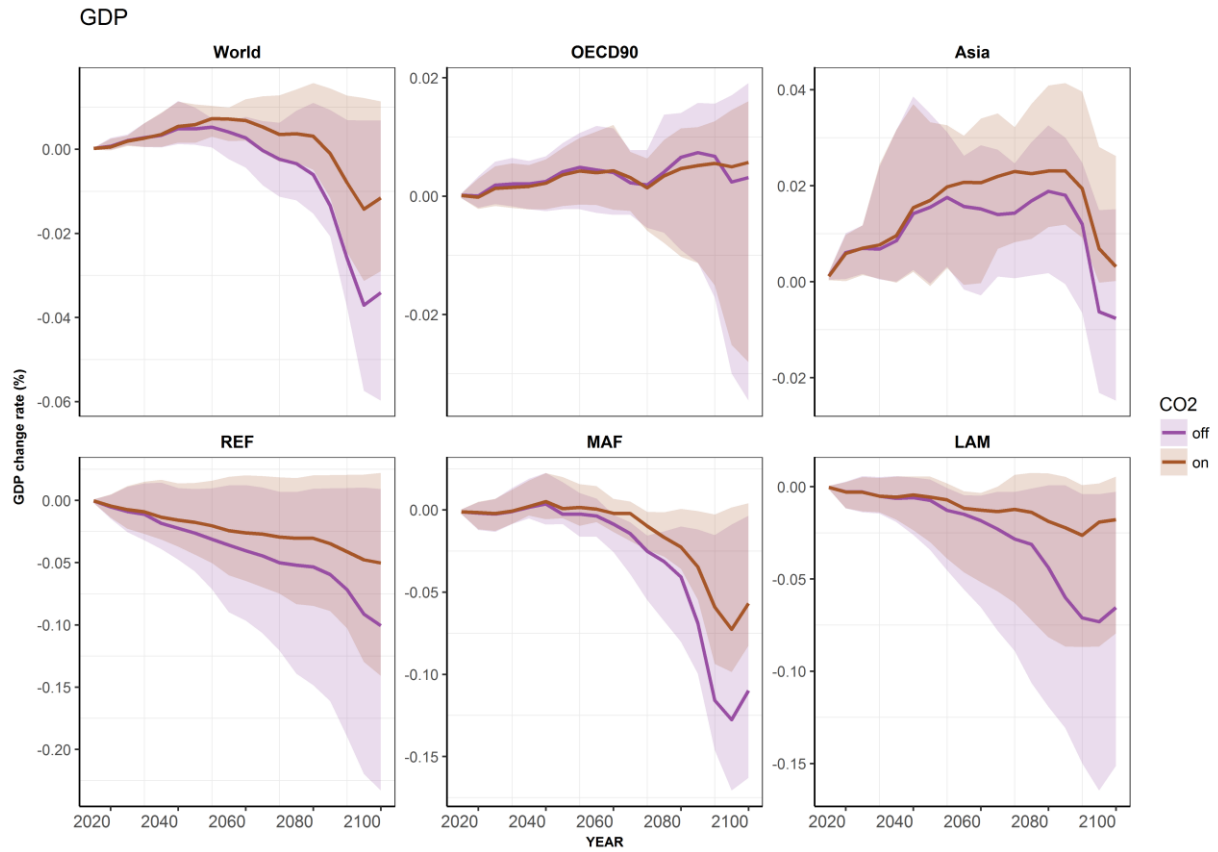

**Figure S5.** The macroeconomic impact due to changes in agricultural yield for RCP8.5 with and without CO<sub>2</sub> fertilization for five regions and the global total. The red and purple colored ribbons indicate the cases with and without consideration of CO<sub>2</sub> fertilization. The line is the median for each case. Regional codes are OECD90, OECD regions; Asia, Asia; REF, Reforming region; MAF, Middle East and Africa; and LAM, Latin America. (The mapping procedure from 17 regions is shown in Table S1.)

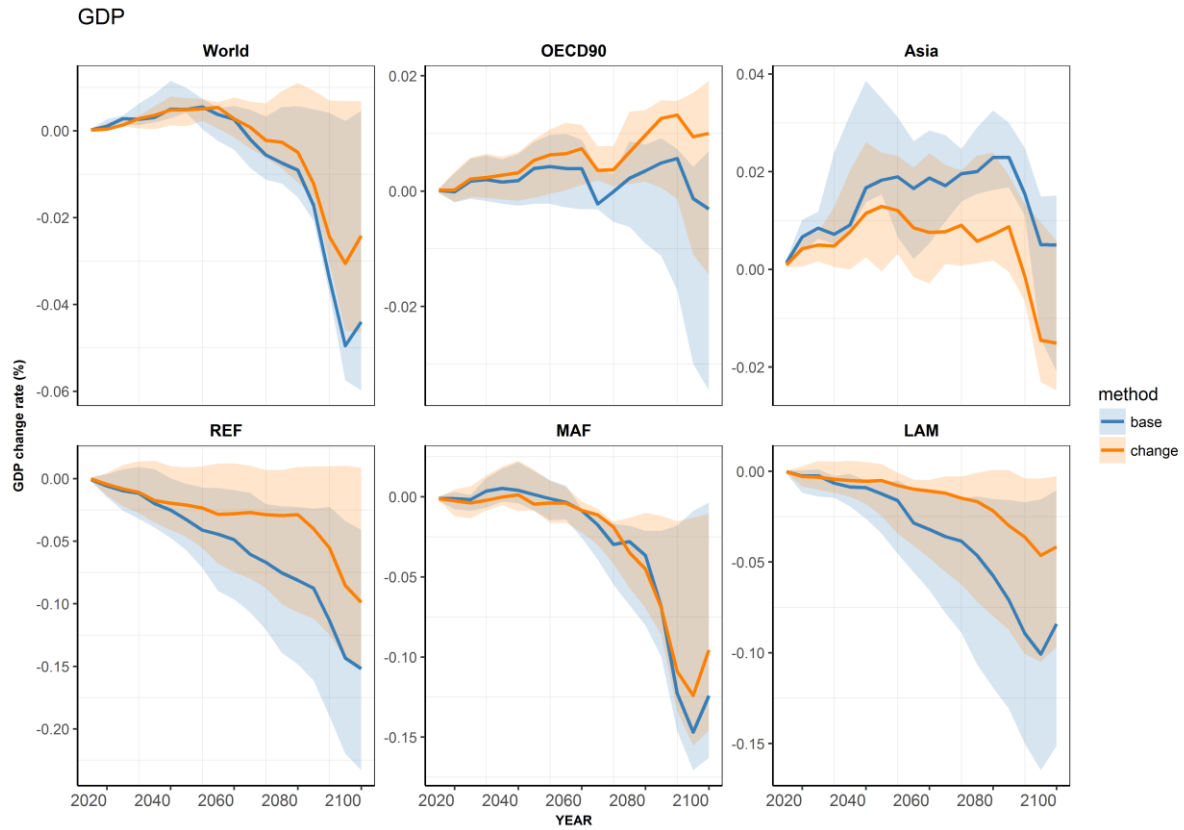

**Figure S6.** The macroeconomic impact due to changes in the agricultural yield for RCP8.5 with and without consideration of land-use change for five regions and the global total. The orange and blue colored ribbons indicate the cases with and without land-use change (change, with land-use; base, without land-use). The line is the median for each case. Regional codes are OECD90, OECD regions; Asia, Asia; REF, Reforming region; MAF, Middle East and Africa; and LAM, Latin America. (The mapping procedure from 17 regions is shown in Table S1.)

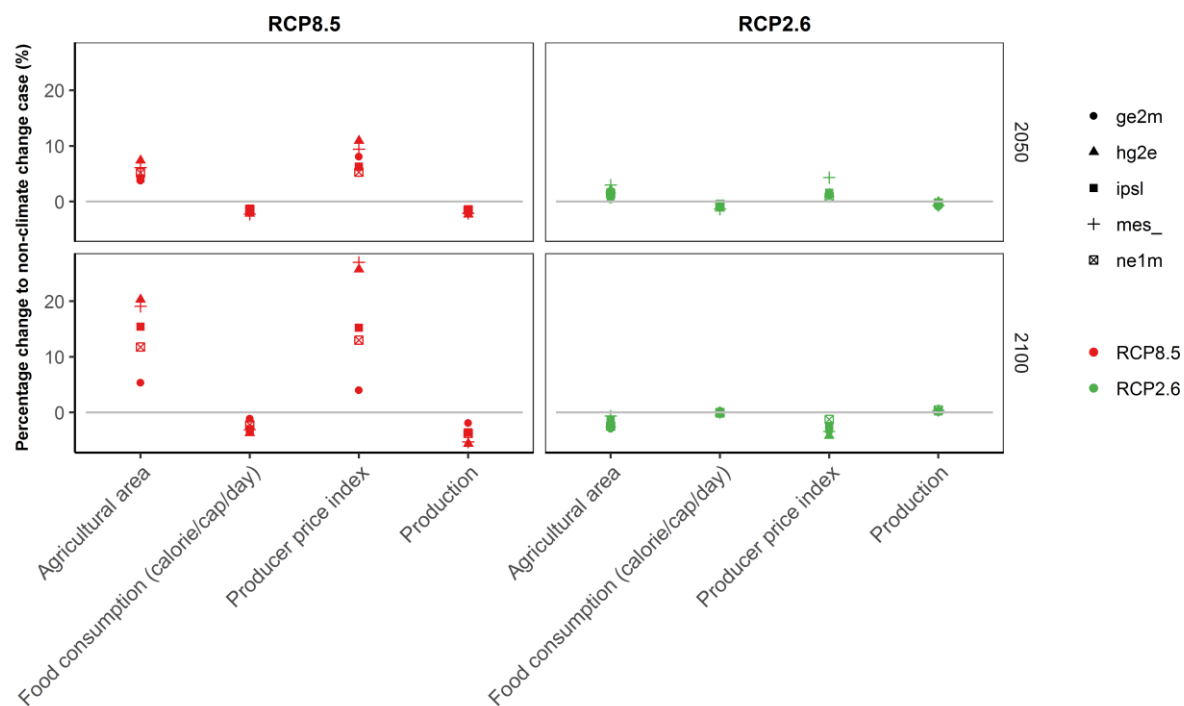

**Figure S7.** Global main indicators' changes for RCP2.6 (right) and RCP8.5 (left) in 2050 (top) and 2010 (bottom). The main indicators the main indicators here are agricultural area, food consumption, producer price, and production. The values are all presented as percentage changes compared to baseline no climate change cases.

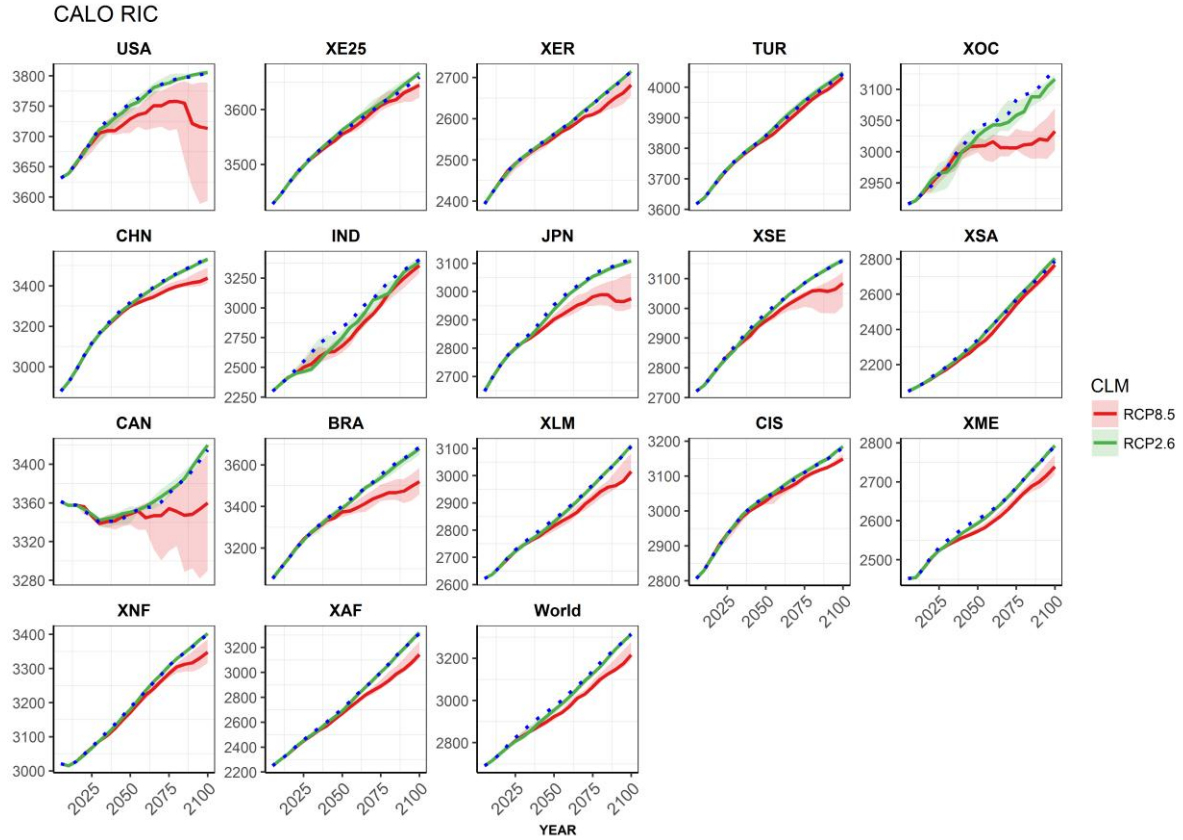

**Figure S8.** Food consumption as colorific in take per capita, per day change for the 17 regions of the Asia-Pacific Integrated Model/Computable General Equilibrium (AIM/CGE) and the global average in two climate change cases (green; RCP2.6 and red; RCP8.5) and the no climate change (NoCC) case (blue dot). The ribbon indicates the range of uncertainty of five general circulation models (GCMs). The unit is t/ha.

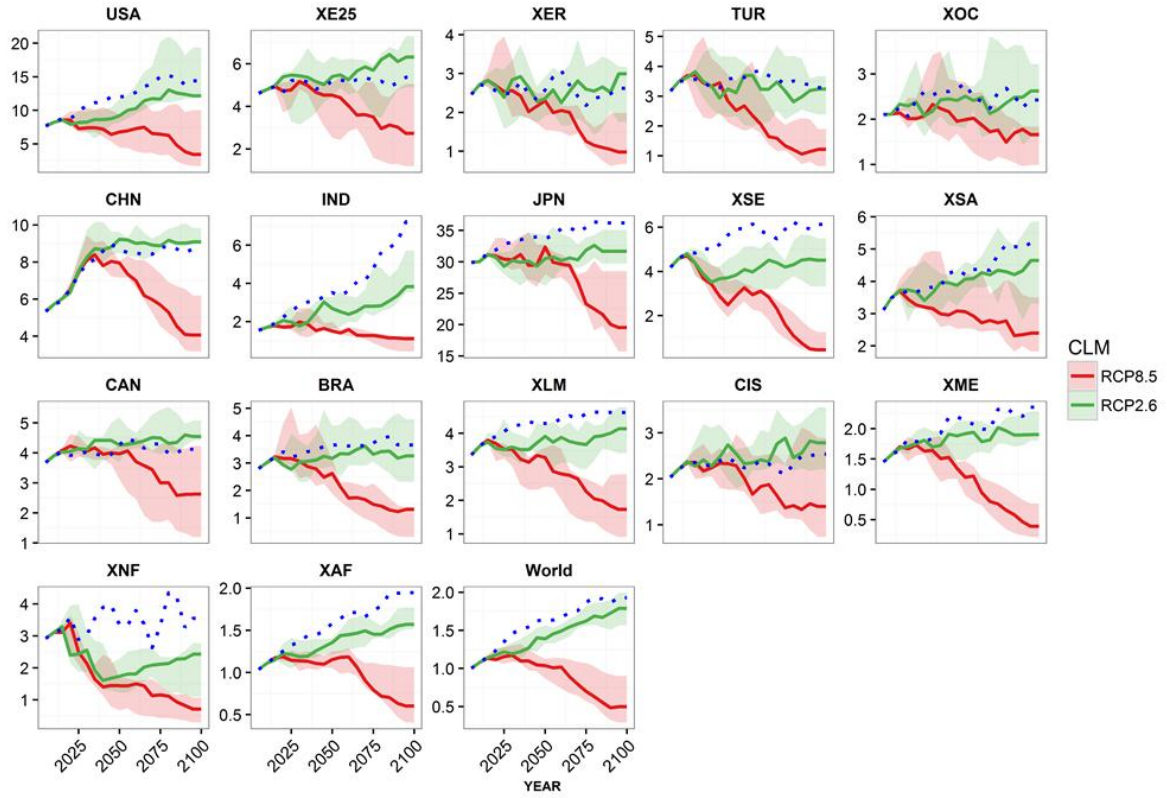

**Figure S9.** Yield change of coarse grains for the 17 regions of the Asia-Pacific Integrated Model/Computable General Equilibrium (AIM/CGE) and the global average in two climate change cases (green; RCP2.6 and red; RCP8.5) and the no climate change (NoCC) case (blue dot). The ribbon indicates the range of uncertainty of five general circulation models (GCMs). The unit is t/ha.



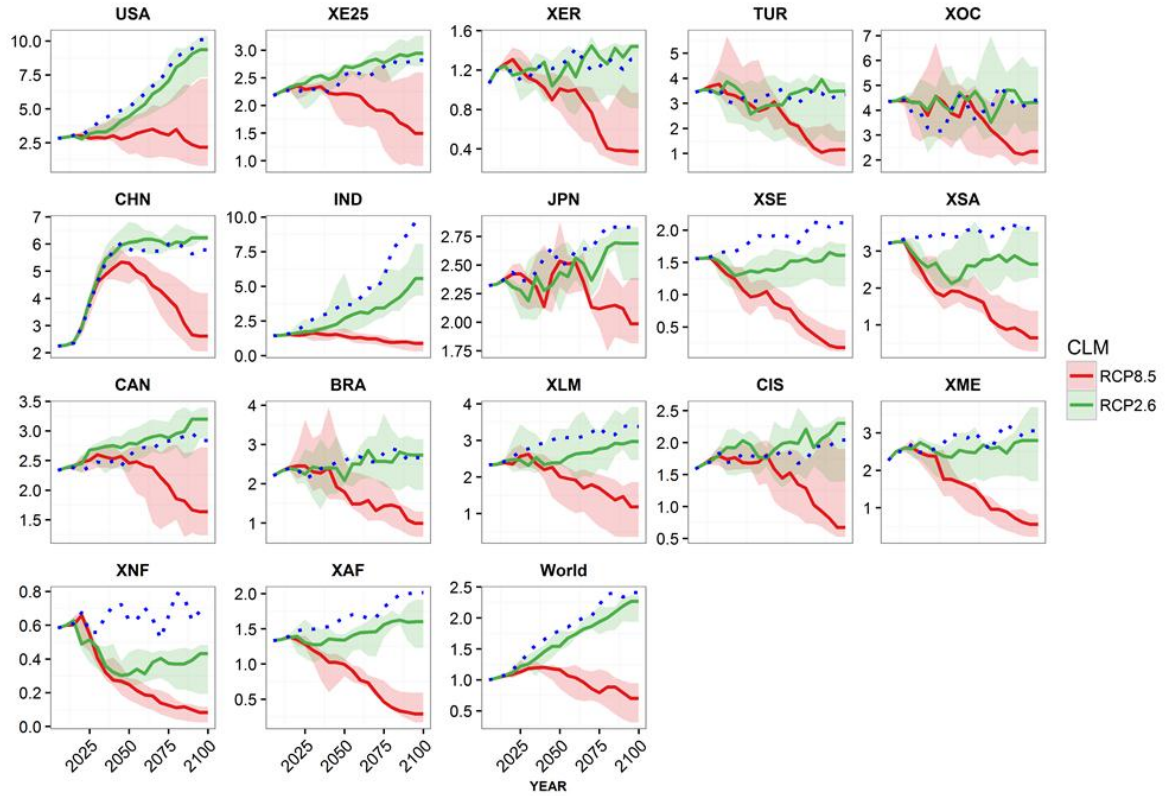

**Figure S10.** Yield change of oil seeds for the 17 regions of the Asia-Pacific Integrated Model/Computable General Equilibrium (AIM/CGE) and the global average in two climate change cases (green; RCP2.6 and red; RCP8.5) and the no climate change (NoCC) case (blue dot). The ribbon indicates the range of uncertainty of five general circulation models (GCMs). The unit is t/ha.

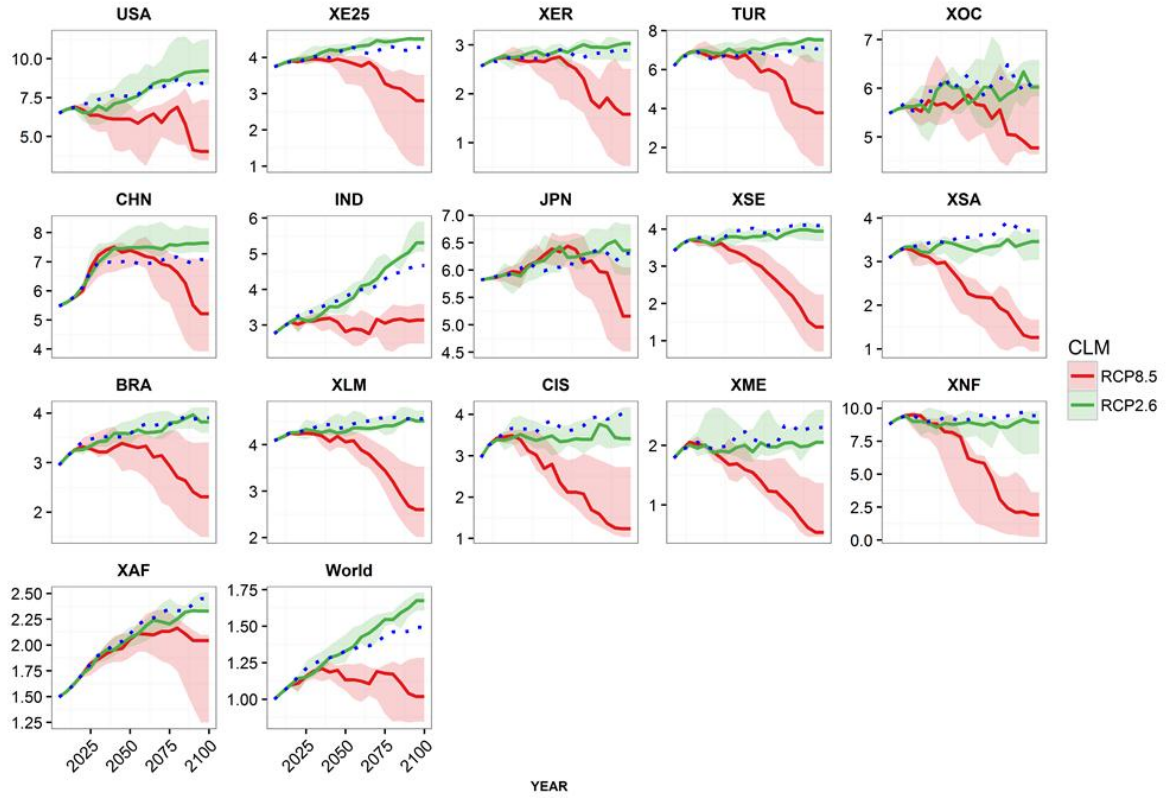

**Figure S11.** Yield change of rice for the 17 regions of the Asia-Pacific Integrated Model/Computable General Equilibrium (AIM/CGE) and the global average in two climate change cases (green; RCP2.6 and red; RCP8.5) and the no climate change (NoCC) case (blue dot). The ribbon indicates the range of uncertainty of five general circulation models (GCMs). The unit is t/ha.

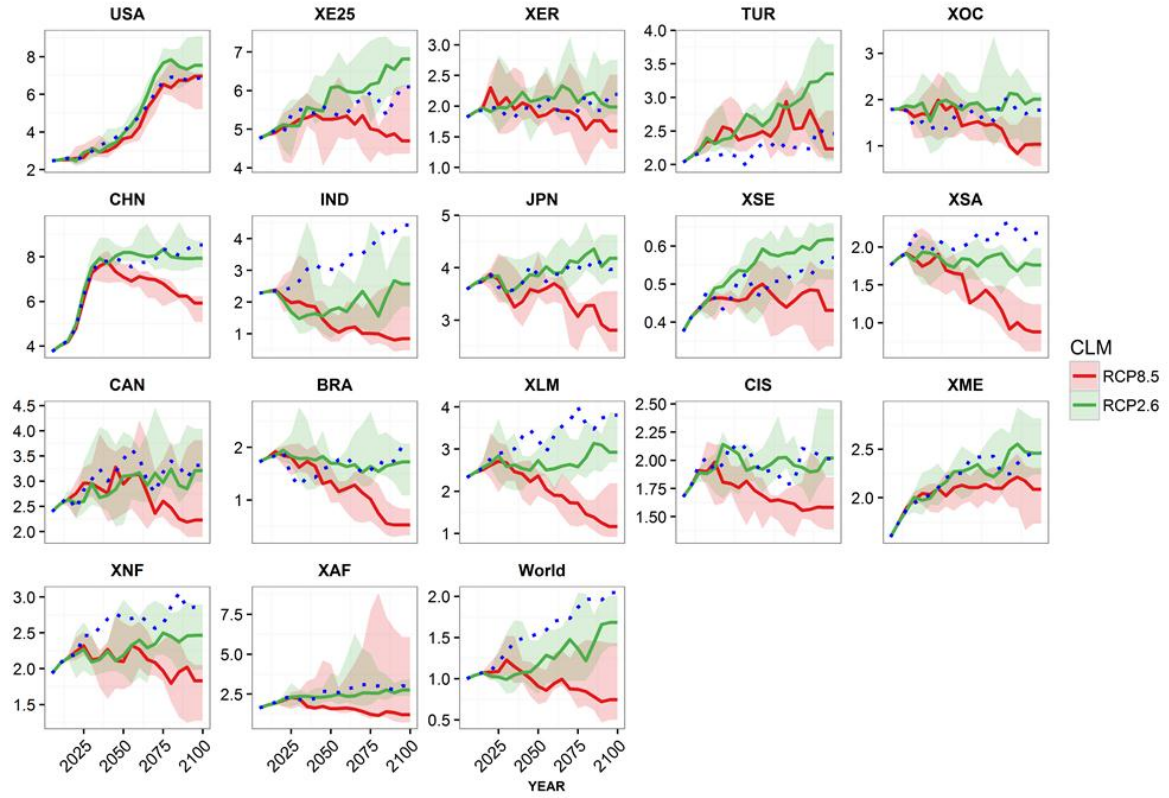

**Figure S12.** Yield change of wheat for the 17 regions of the Asia-Pacific Integrated Model/Computable General Equilibrium (AIM/CGE) and the global average in two climate change cases (green; RCP2.6 and red; RCP8.5) and the no climate change (NoCC) case (blue dot). The ribbon indicates the range of uncertainty of five general circulation models (GCMs). The unit is t/ha.

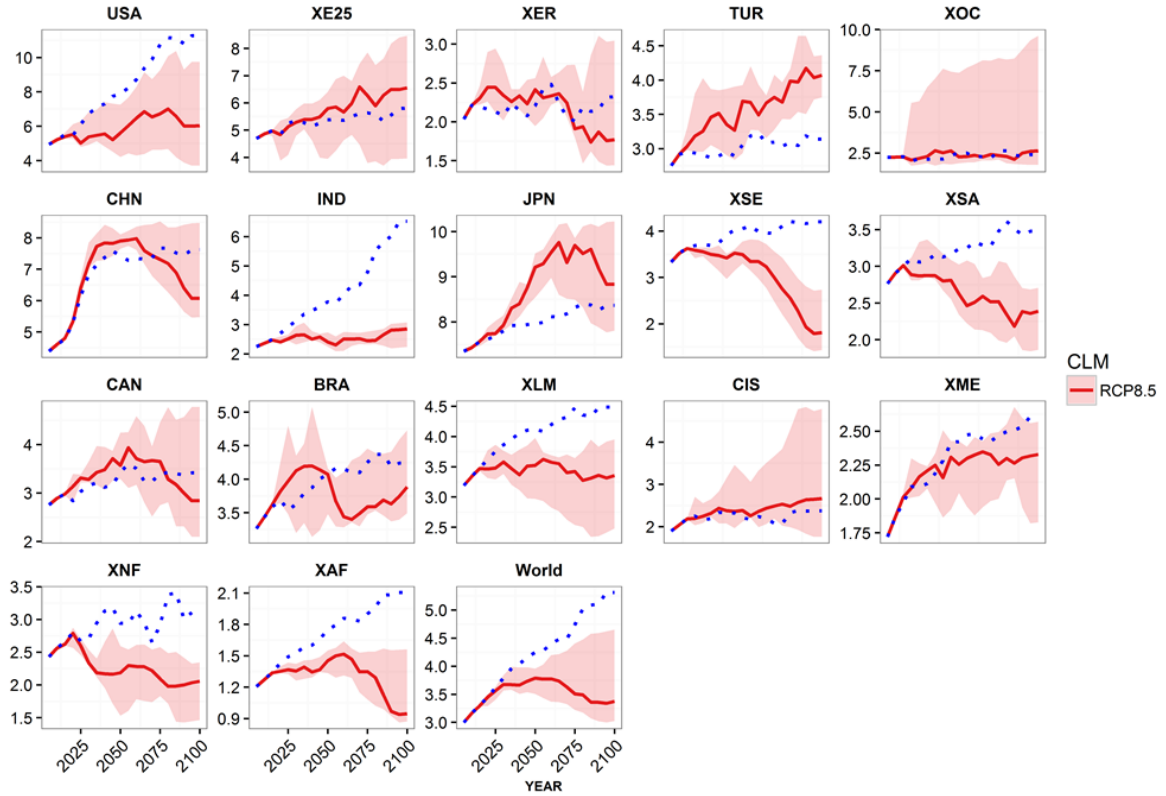

**Figure S13.** Yield change of five major crops for the 17 regions of the Asia-Pacific Integrated Model/Computable General Equilibrium (AIM/CGE) and the global average in a climate change (RCP8.5) case and the no climate change (NoCC) cases (blue dot). The ribbon indicates the range of uncertainty of five general circulation models (GCMs). The unit is t/ha. Here, CO<sub>2</sub> fertilization is considered.

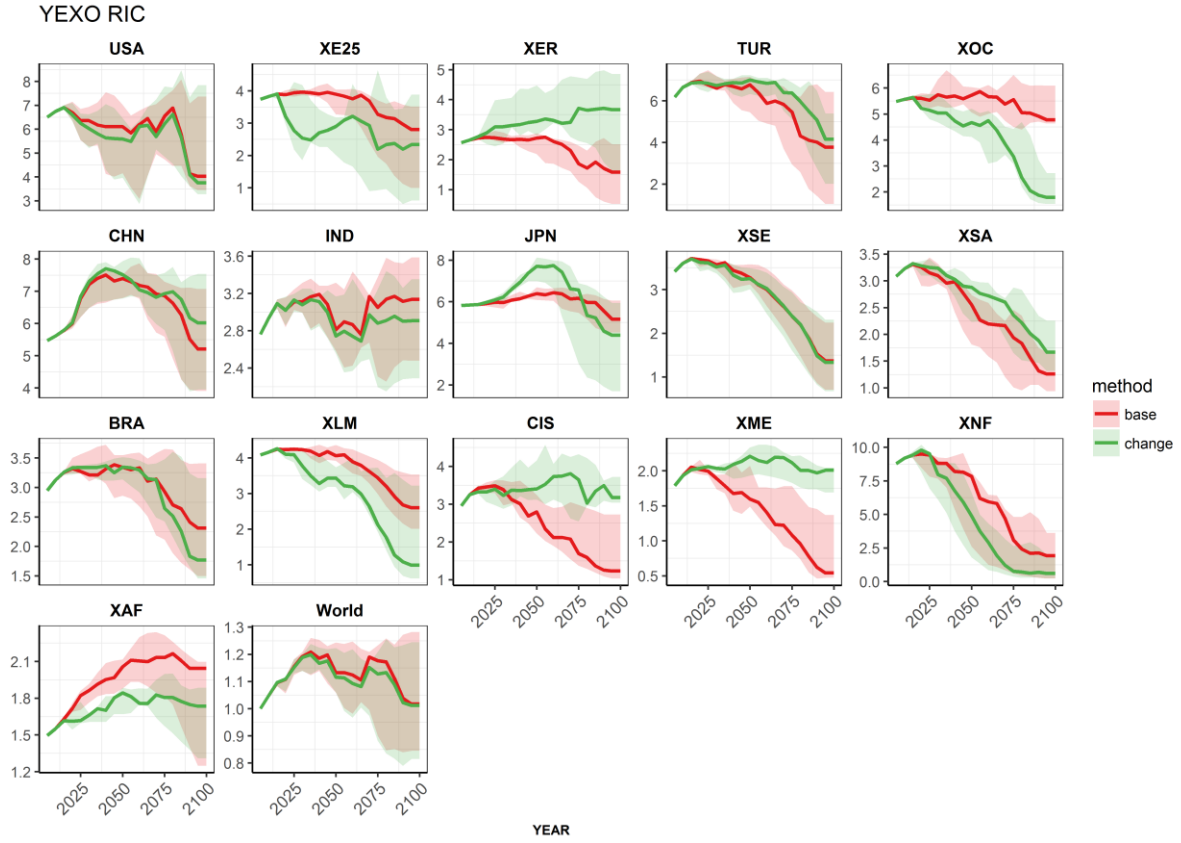

**Figure S14.** Rice yield for 17 regions in the Asia-Pacific Integrated Model/Computable General Equilibrium (AIM/CGE) and the global average in two gridded yield aggregation method associated with land-use change (red; fixed as base year harvested area and red; changed dynamically) under RCP8.5 and non-CO<sub>2</sub> fertilization cases. The ribbon indicates the range of uncertainty for five general circulation models (GCMs). The units are t/Ha.

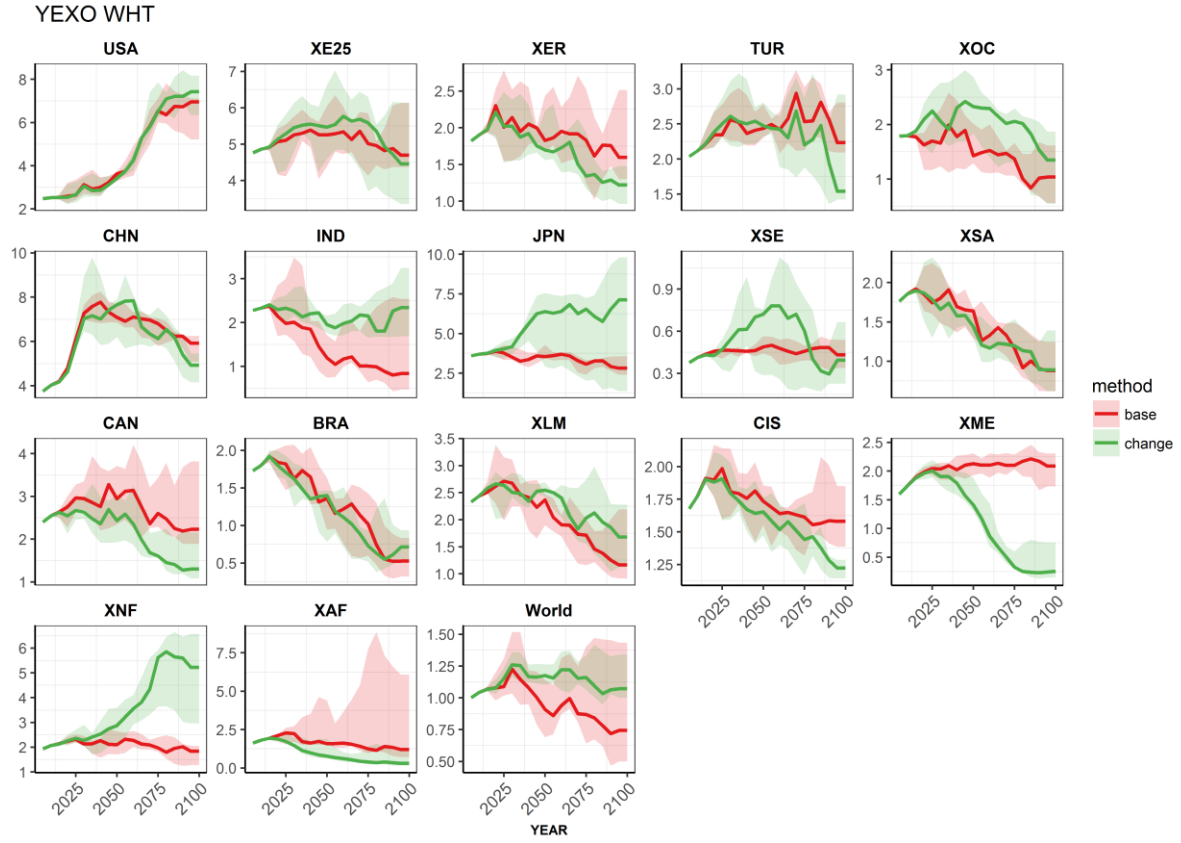

**Figure S15.** Wheat yield for 17 regions in the Asia-Pacific Integrated Model/Computable General Equilibrium (AIM/CGE) and the global average in two gridded yield aggregation method associated with land-use change (red; fixed as base year harvested area and red; changed dynamically) under RCP8.5 and non-CO<sub>2</sub> fertilization cases. The ribbon indicates the range of uncertainty for five general circulation models (GCMs). The units are t/Ha.

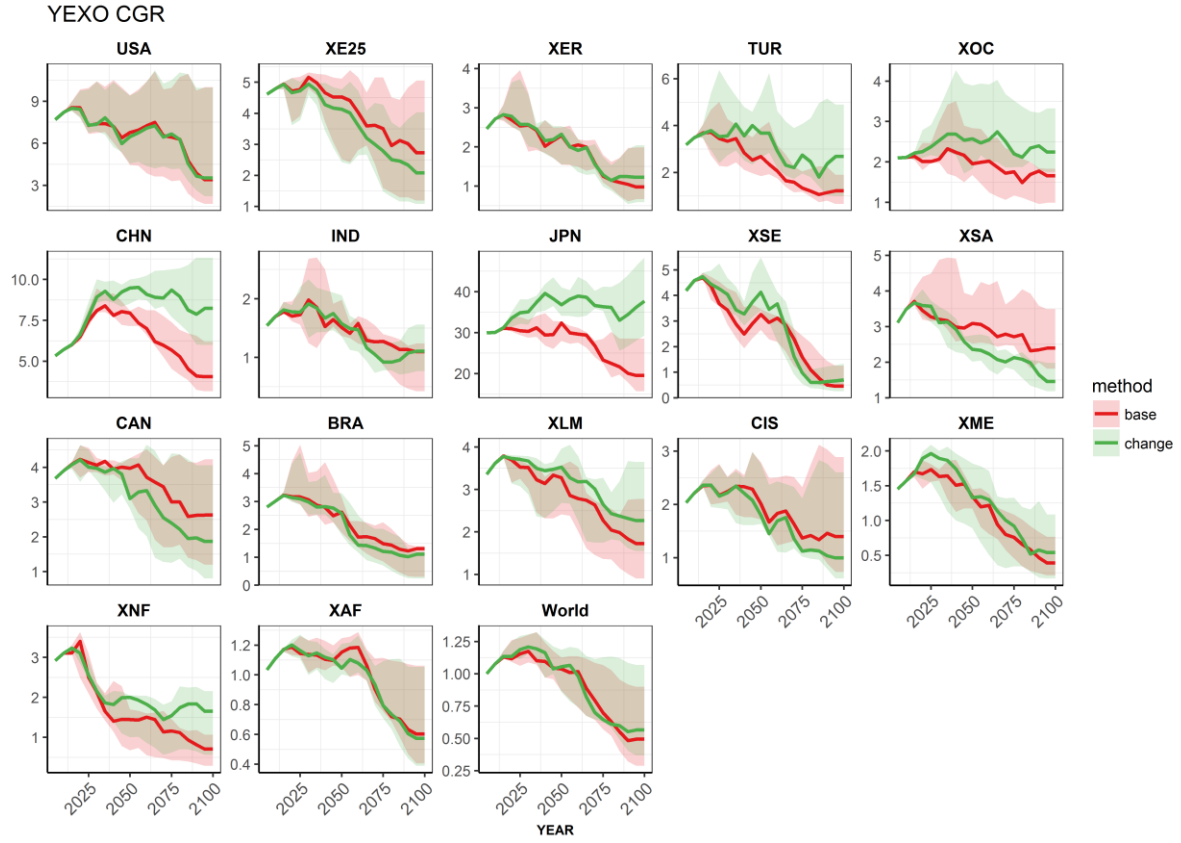

**Figure S16.** Coarse grain yield for 17 regions in the Asia-Pacific Integrated Model/Computable General Equilibrium (AIM/CGE) and the global average in two gridded yield aggregation method associated with land-use change (red; fixed as base year harvested area and red; changed dynamically) under RCP8.5 and non-CO<sub>2</sub> fertilization cases. The ribbon indicates the range of uncertainty for five general circulation models (GCMs). The units are t/Ha.

2. Supplementary Tables

**Table S1.** Regional classifications.

| Code | Region              | Code | Region                |
|------|---------------------|------|-----------------------|
| JPN  | Japan               | TUR  | Turkey                |
| CHN  | China               | CAN  | Canada                |
| IND  | India               | USA  | United States         |
| XSE  | Southeast Asia      | BRA  | Brazil                |
| XSA  | Rest of Asia        | XLM  | Rest of South America |
| XOC  | Oceania             | XME  | Middle East           |
| XE25 | EU25                | XNF  | North Africa          |
| XER  | Rest of Europe      | XAF  | Rest of Africa        |
| CIS  | Former Soviet Union |      |                       |

**Table S2.** Land use classification.

|                          |                                |
|--------------------------|--------------------------------|
| Cropland                 | Wheat, irrigated               |
|                          | Other coarse grains, irrigated |
|                          | Oil crops, irrigated           |
|                          | Sugar crops, irrigated         |
|                          | Rice, rainfed                  |
|                          | Wheat, rainfed                 |
|                          | Other coarse grains, rainfed   |
|                          | Oil crops, rainfed             |
|                          | Sugar crops, rainfed           |
|                          | Other crops                    |
|                          | Bioenergy crops                |
| Afforestation            |                                |
| Settlement               |                                |
| Ice and water            |                                |
| Other land use           |                                |
| Forest                   |                                |
| Pasture                  |                                |
| Other natural vegetation |                                |



**Table S3.** Industrial classification.

| Agricultural sector           | Energy supply sector                                     | Other production sector                |
|-------------------------------|----------------------------------------------------------|----------------------------------------|
| Rice                          | Coal mining                                              | Mineral mining and other quarrying     |
| Wheat                         | Oil mining                                               | Food products                          |
| Other grains                  | Gas mining                                               | Textiles, apparel, and leather         |
| Oil seed crops                | Petroleum refinery                                       | Wood products                          |
| Sugar crops                   | Coal transformation                                      | Paper, paper products, and pulp        |
| Other crops                   | Biomass transformation (1st generation)                  | Chemical, plastic, and rubber products |
| Ruminant livestock            | Biomass transformation (2nd generation with energy crop) | Iron and steel                         |
| Raw milk                      | Biomass transformation (2nd generation with residue)     | Nonferrous products                    |
| Other livestock and fisheries | Gas manufacture distribution                             | Other manufacturing                    |
| Forestry                      | Coal-fired power                                         | Construction                           |
|                               | Oil-fired power                                          | Transport and communications           |
|                               | Gas-fired power                                          | Other service sectors                  |
|                               | Nuclear power                                            | CCS service                            |
|                               | Hydroelectric power                                      |                                        |
|                               | Geothermal power                                         |                                        |
|                               | Photovoltaic power                                       |                                        |
|                               | Wind power                                               |                                        |
|                               | Waste biomass power                                      |                                        |
|                               | Other renewable energy power generation                  |                                        |
|                               | Advanced biomass-power generation                        |                                        |

**Table S4.** List of general circulation models (GCMs).

| Code | Model name   |
|------|--------------|
| ge2m | GFDL-ESM2M   |
| hg2e | HadGEM2-ES   |
| ipsl | IPSL-CM5A-LR |
| mes_ | MIROC-ESM    |
| ne1m | NorESM1-M    |

**Table S5.** Share of primary sector's value added in total GDP for SSP1, SSP2, and SSP3.

|                       | SSP1  |      | SSP2 |      | SSP3 |       |       |
|-----------------------|-------|------|------|------|------|-------|-------|
|                       | 2005  | 2050 | 2100 | 2050 | 2100 | 2050  | 2100  |
| United States         | 1.2%  | 0.6% | 0.6% | 0.7% | 0.6% | 0.7%  | 0.8%  |
| EU25                  | 2.0%  | 1.0% | 0.5% | 1.0% | 0.5% | 1.2%  | 0.9%  |
| Rest of Europe        | 3.4%  | 1.4% | 0.6% | 1.4% | 0.6% | 1.9%  | 1.5%  |
| Turkey                | 11.0% | 4.9% | 2.2% | 4.9% | 2.2% | 6.9%  | 6.7%  |
| Oceania               | 3.6%  | 2.4% | 2.2% | 2.4% | 2.2% | 2.4%  | 2.6%  |
| China                 | 12.5% | 3.2% | 2.4% | 3.2% | 2.4% | 4.1%  | 4.0%  |
| India                 | 18.6% | 5.4% | 1.5% | 5.4% | 1.5% | 11.3% | 10.4% |
| Japan                 | 1.5%  | 0.6% | 0.3% | 0.6% | 0.3% | 0.7%  | 0.5%  |
| Southeast Asia        | 6.8%  | 2.3% | 1.0% | 2.3% | 1.0% | 3.5%  | 3.0%  |
| Rest of Asia          | 18.5% | 7.4% | 2.1% | 7.4% | 2.1% | 14.5% | 13.5% |
| Canada                | 1.9%  | 1.2% | 0.7% | 1.2% | 0.7% | 1.2%  | 0.8%  |
| Brazil                | 6.1%  | 2.2% | 1.1% | 2.2% | 1.1% | 3.2%  | 3.5%  |
| Rest of South America | 6.0%  | 3.4% | 1.6% | 3.4% | 1.6% | 4.6%  | 4.1%  |
| Former Soviet Union   | 6.6%  | 2.4% | 1.3% | 2.4% | 1.3% | 3.0%  | 2.5%  |
| Middle East           | 4.8%  | 2.5% | 1.4% | 2.5% | 1.4% | 3.6%  | 3.7%  |
| North Africa          | 11.4% | 4.2% | 1.7% | 4.2% | 1.7% | 6.6%  | 5.9%  |
| Rest of Africa        | 16.2% | 6.8% | 2.6% | 6.8% | 2.6% | 11.7% | 11.8% |
| World                 | 3.7%  | 2.3% | 1.3% | 2.3% | 1.3% | 3.2%  | 3.9%  |

**Table S6.** Price elasticity in 2050 baseline case. The numbers are derived from LES (Linear Expenditure System) consumption function.

|      | Wheat | Oil seed | Rice  | Other grains | Other crops | Ruminant | Non-ruminant | Dairy product |
|------|-------|----------|-------|--------------|-------------|----------|--------------|---------------|
| USA  | 0.00  | -0.05    | 0.00  | 0.00         | 0.00        | -0.04    | -0.04        | -0.04         |
| XE25 | 0.00  | -0.05    | 0.00  | 0.00         | 0.00        | -0.04    | -0.04        | -0.04         |
| XER  | 0.00  | -0.13    | 0.00  | 0.00         | 0.00        | -0.06    | -0.06        | -0.06         |
| TUR  | -0.01 | -0.05    | -0.01 | -0.01        | -0.01       | -0.10    | -0.10        | -0.10         |
| XOC  | 0.00  | -0.05    | 0.00  | 0.00         | 0.00        | -0.05    | -0.05        | -0.05         |
| CHN  | 0.00  | -0.09    | 0.00  | 0.00         | 0.00        | -0.05    | -0.05        | -0.05         |
| IND  | -0.02 | -0.13    | -0.02 | -0.02        | -0.09       | N/A      | -0.13        | -0.13         |
| JPN  | 0.00  | -0.05    | 0.00  | 0.00         | 0.00        | -0.07    | -0.07        | -0.07         |
| XSE  | 0.00  | -0.05    | 0.00  | 0.00         | -0.04       | -0.10    | -0.11        | -0.10         |
| XSA  | -0.02 | -0.13    | -0.02 | -0.02        | -0.09       | -0.13    | -0.13        | -0.13         |
| CAN  | 0.00  | -0.05    | 0.00  | 0.00         | 0.00        | -0.04    | -0.04        | -0.04         |
| BRA  | -0.02 | -0.11    | -0.02 | -0.02        | 0.00        | -0.05    | -0.05        | -0.05         |

|     |       |       |       |       |       |       |       |       |
|-----|-------|-------|-------|-------|-------|-------|-------|-------|
| XLM | −0.02 | −0.11 | −0.02 | −0.02 | 0.00  | −0.07 | −0.07 | −0.07 |
| CIS | 0.00  | −0.13 | 0.00  | 0.00  | 0.00  | −0.06 | −0.06 | −0.06 |
| XME | −0.01 | −0.08 | −0.01 | −0.01 | −0.01 | −0.13 | −0.13 | −0.13 |
| XNF | −0.01 | −0.08 | −0.01 | −0.01 | −0.01 | −0.12 | −0.12 | −0.12 |
| XAF | −0.02 | −0.14 | −0.02 | −0.02 | −0.10 | −0.18 | −0.18 | −0.18 |

**Table S7.** Income elasticity in 2050 baseline case. The numbers are derived from LES (Linear Expenditure System) consumption function.

|      | WHT  | OSD  | RIC  | CGR  | OCR  | RUM  | NRM  | DRY  |
|------|------|------|------|------|------|------|------|------|
| USA  | 0.01 | 0.09 | 0.01 | 0.01 | 0.01 | 0.07 | 0.07 | 0.07 |
| XE25 | 0.01 | 0.09 | 0.01 | 0.01 | 0.01 | 0.07 | 0.07 | 0.07 |
| XER  | 0.01 | 0.25 | 0.01 | 0.01 | 0.01 | 0.12 | 0.12 | 0.12 |
| TUR  | 0.01 | 0.10 | 0.01 | 0.01 | 0.01 | 0.19 | 0.19 | 0.19 |
| XOC  | 0.01 | 0.09 | 0.01 | 0.01 | 0.01 | 0.09 | 0.09 | 0.09 |
| CHN  | 0.01 | 0.17 | 0.01 | 0.01 | 0.01 | 0.10 | 0.10 | 0.10 |
| IND  | 0.03 | 0.25 | 0.03 | 0.03 | 0.17 | NA   | 0.25 | 0.25 |
| JPN  | 0.01 | 0.09 | 0.01 | 0.01 | 0.01 | 0.13 | 0.13 | 0.13 |
| XSE  | 0.01 | 0.09 | 0.01 | 0.01 | 0.07 | 0.20 | 0.20 | 0.20 |
| XSA  | 0.03 | 0.26 | 0.03 | 0.03 | 0.18 | 0.25 | 0.25 | 0.25 |
| CAN  | 0.01 | 0.09 | 0.01 | 0.01 | 0.01 | 0.08 | 0.08 | 0.08 |
| BRA  | 0.03 | 0.21 | 0.03 | 0.03 | 0.01 | 0.10 | 0.10 | 0.10 |
| XLM  | 0.03 | 0.22 | 0.03 | 0.03 | 0.01 | 0.13 | 0.13 | 0.13 |
| CIS  | 0.01 | 0.25 | 0.01 | 0.01 | 0.01 | 0.11 | 0.11 | 0.11 |
| XME  | 0.01 | 0.16 | 0.01 | 0.01 | 0.01 | 0.26 | 0.26 | 0.26 |
| XNF  | 0.01 | 0.16 | 0.01 | 0.01 | 0.01 | 0.23 | 0.23 | 0.23 |
| XAF  | 0.03 | 0.26 | 0.03 | 0.03 | 0.18 | 0.33 | 0.33 | 0.33 |

## Reference

1. Fujimori, S.; Hasegawa, T.; Masui, T.; Takahashi, K.; Herran, D.S.; Dai, H.; Hijioka, Y.; Kainuma, M. SSP3: AIM implementation of Shared Socioeconomic Pathways. *Glob. Environ. Chang.* **2017**, *42*, 268–283.
